# Supplementary material
Source: Royal Society of Chemistry journal article supplement (doi:10.1039/d6qm00250a)
Supplement: d6qm00250a1.pdf [file d6qm00250a1.pdf]

# Supporting Information

## **Fabrication of Cu nanoparticles@MOF via partial pyrolysis of hybrid dual-MOFs for high-efficiency electrocatalytic nitrate reduction**

*Shaorui Yang<sup>1, a</sup>, Fanshi Meng<sup>1, a</sup>, Hengbo Tian<sup>b</sup>, Xinyu Wang<sup>\*, a</sup>, Min Ma<sup>\*, a</sup>,*

*Qingzhong Xue<sup>\*, a</sup>, Jian Tian<sup>\*, a</sup>*

*<sup>a</sup> State Key Laboratory of Disaster Prevention and Ecology Protection in Open-pit Coal  
Mines, Shandong Key Laboratory of Special Epoxy Resin, School of Materials Science  
and Engineering, Shandong University of Science and Technology, Qingdao 266590,  
China*

*<sup>b</sup> Linyi Changrong Environmental Protection Technology Co. Ltd., Linyi 276018,  
China*

*\* Corresponding authors: wxy13953843742@163.com (X. Wang);  
mamin@sdust.edu.cn (M, Ma); xueqz@upc.edu.cn (Q, Xue); jiantian@sdust.edu.cn (J.  
Tian)*

*<sup>1</sup> These authors contributed equally to this work.*

### **Synthesis of etched samples of the HKUST-1/ZIF-8**

200 mg of HKUST-1/ZIF-8 and 0.5 mL of HAc were added to 5 mL of methanol and stirred at room temperature for 30 min. The product was collected by centrifugation, washed with methanol several times, and dried at 80°C overnight. It was

labeled as HKUST-1/ZIF-8-A, where A stands for acetic acid. 200 mg of HKUST-1/ZIF-8 and  $\text{NH}_3 \cdot \text{H}_2\text{O}$  (0.5 mL) were added to 5 mL of methanol and stirred at room temperature for 30 minutes. The product was collected by centrifugation, washed with methanol several times, and dried at 80 °C overnight, denoted as HKUST-1/ZIF-8-B, where B stands for ammonia water.

### **Preparation of working electrode**

The purchased PTFE-coated glassy carbon electrode with a diameter of 6 mm was used as the working electrode. 5 mg Cu@C/ZIF-8 was dispersed at 490  $\mu\text{L}$  Deionized water and 490  $\mu\text{L}$  in isopropyl alcohol, then 20  $\mu\text{L}$  Nafion solution was added, followed by sonicating for 30 min. The above ink was dropped onto the pre-cleaned glassy carbon electrode and dried. The preparation methods of Cu NPs and ZIF-8-350 working electrodes were the same except for different samples.

### **Electrochemical measurements**

The Nafion membrane was first boiled in water at 80 °C for 1 h, next in  $\text{H}_2\text{O}_2$  and water at 80 °C for 1 h respectively, then 0.5 M  $\text{H}_2\text{SO}_4$  for 3 h, and finally in water for 6 h before  $\text{NO}_3^-$ RR test. The electrochemical test was performed on the CHI660 electrochemical workstation with a three-electrode configuration, the glassy carbonelectrode was used as the working electrode, Ag/AgCl with saturated KCl was the reference electrode, and platinum mesh was the counter electrode. All tested potentials were 95% IR compensation. The potentials were converted to RHE by the following formula:  $E(\text{vs. RHE}) = E(\text{vs. Ag/AgCl}) + 0.197 + 0.0591 \times \text{pH}$ . Linear sweep voltammetry (LSV) testing was examined at ambient temperature with a scan

rate of  $5 \text{ mV s}^{-1}$ . The electrolyte used in the electrochemical test was  $0.1 \text{ M KNO}_3$  and  $0.1 \text{ M NaSO}_4$ .

### **Electrochemical active surface areas (ECSAs) measurements**

Electrochemical active surface areas (ECSAs) were measured in the non-Faradaic region from  $-0.66 \text{ V}$  to  $-0.56 \text{ V}$  by cyclic voltammetry (CV) with different scanning rates ( $5\sim 50 \text{ mV s}^{-1}$ ) in  $0.1 \text{ M NaSO}_4$  with  $0.1 \text{ M KNO}_3$ . Double-layer capacitances (Cdl) can be easily obtained by plotting the current density as a function of scan rate in CV curves. And the Cdl value is proportional to ECSA, meaning a higher Cdl represents a larger ECSA for these studied catalysts.

### **Determination of ammonia by UV-vis method**

The concentration of  $\text{NH}_3$  produced was determined by indophenol blue spectrophotometry. In detail,  $2 \text{ mL}$  aliquot of the solution was taken out of the cathode chamber of the H-type electrolytic cell. Then, add  $2 \text{ mL}$  of  $1.0 \text{ M NaOH}$  solution containing  $5 \text{ wt.}\%$  salicylic acid and  $5 \text{ wt.}\%$  sodium citrate, followed by the addition of  $1 \text{ mL}$  of  $0.05 \text{ M NaClO}$  and  $0.2 \text{ mL}$  of an aqueous solution of  $1 \text{ wt.}\%$   $\text{Na}_2[\text{Fe}(\text{NO})(\text{CN})_5] \cdot 2\text{H}_2\text{O}$ . After  $2 \text{ h}$  at room temperature, the UV-vis absorption spectrum was tested using a UV-2600i ultraviolet-visible spectrophotometer. The absorbance at a wavelength of  $655 \text{ nm}$  was used to determine the formation of indoxyl blue. Using standard  $\text{NH}_4\text{Cl}$  solutions with a range of concentrations to calibrate the concentration-absorbance curve

### **Determination of hydrazine**

A mixture of p-(dimethylamino)benzaldehyde (5.99 g), 1.0 M HCl (30 mL) and ethanol (300 mL) was used as a color reagent. 5 mL of electrolyte solution was extracted from the electrolytic cell, and then 5 mL of color reagent was added and mixed uniformly. After the mixture solution was let stand for 10 min, the absorption intensity at a wavelength of 456 nm was recorded.

### **Determination of nitrite**

A mixture of p-aminobenzenesulfonamide (4g), N-(1-Naphthyl) ethylenediamine dihydrochloride (0.2 g), ultrapure water (100 mL) and phosphoric acid (10 mL,  $\rho=1.70$  g/mL) was used as a color reagent. 1.0 mL of the electrolyte was removed from the electrolytic cell and diluted to 5 mL to the detection range. Next, 0.1 mL of the color reagent was added into the aforementioned 5 mL solution and mixed uniformly. After the mixture solution was let stand for 20 min, the absorption intensity at a wavelength of 540 nm was recorded. The concentration-absorbance curve was calibrated using a series of standard sodium nitrite solutions.

### **Calculation of the yield rate, and Faradaic efficiency**

The yield rate of electrocatalytic  $\text{NO}_3^- \rightarrow \text{NH}_3$  was defined according to Eq. (1):

$$\gamma_{\text{NH}_3} = (C_{\text{NH}_3} \times V) \div (t \times m_{\text{cat.}}) \quad (1)$$

The content of the by-product  $\text{NO}_2^-$  is calculated similarly, except that  $C_{\text{NH}_3}$  is replaced by C. The Faradaic efficiency of the electrocatalytic  $\text{NO}_3^- \rightarrow \text{NH}_3$  was defined from the electric charge consumed for synthesizing ammonia and total charge passed through the electrode according to Eq. (2):

$$\text{FE}_{\text{NH}_3} = (8 \times F \times C_{\text{NH}_3} \times V) / (17 \times Q) \quad (2)$$

The Faradaic efficiency of electrocatalytic  $\text{NO}_3^- \rightarrow \text{NO}_2^-$  was defined from the electric charge consumed for synthesizing ammonia and total charge passed through the electrode according to Eq. (3):

$$FE_{\text{NO}_2^-} = (2 \times F \times C_{\text{NO}_2^-} \times V) / (46 \times Q) \quad (3)$$

where  $C_{\text{NH}_3}$  is the concentration of  $\text{NH}_3(\text{aq})$ ,  $V$  is the volume of electrolyte in the cathode compartment (70 mL),  $t$  is the electrolysis time (2 h),  $C$  is the generated concentration of ammonia or nitrite,  $F$  is the Faradaic constant ( $96485 \text{ C mol}^{-1}$ ),  $Q$  is the total charge passing the electrode, and  $m_{\text{cat}}$  is the loading mass of catalysts.

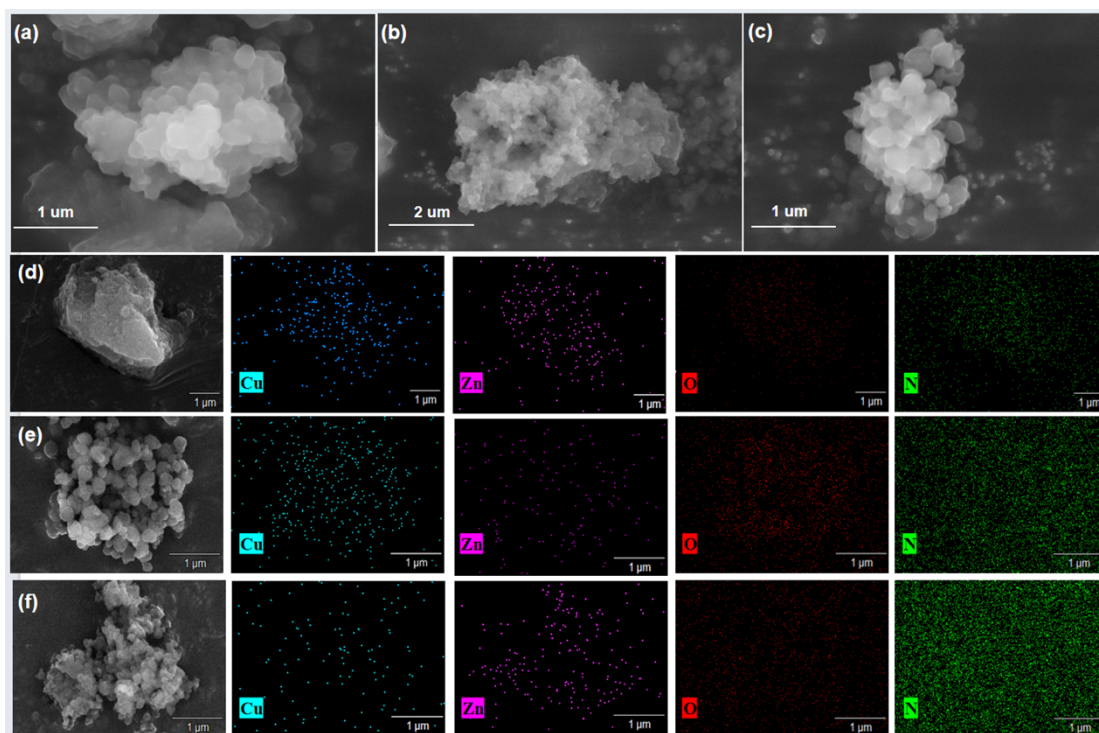

**Fig. S1.** SEM images of (a) HKUST-1/ZIF-8, (b) HKUST-1/ZIF-8-A and (c) HKUST-1/ZIF-8-B; EDS elemental mapping images of (d) HKUST-1/ZIF-8, (e) HKUST-1/ZIF-8-A and (f) HKUST-1/ZIF-8-B.

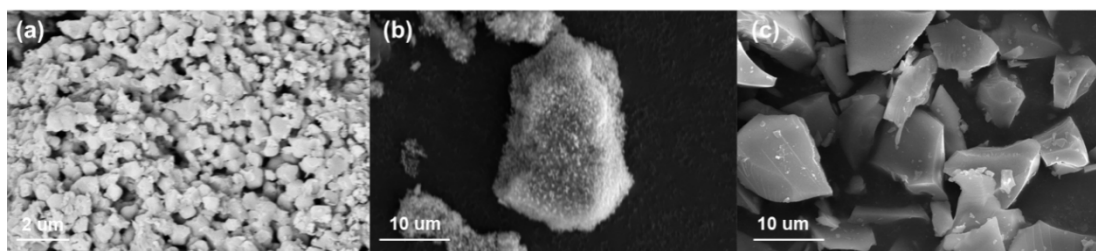

Fig. S2. SEM images of (a) ZIF-8-350, (b) Cu NPs, (c) Cu@C/ZIF-8.

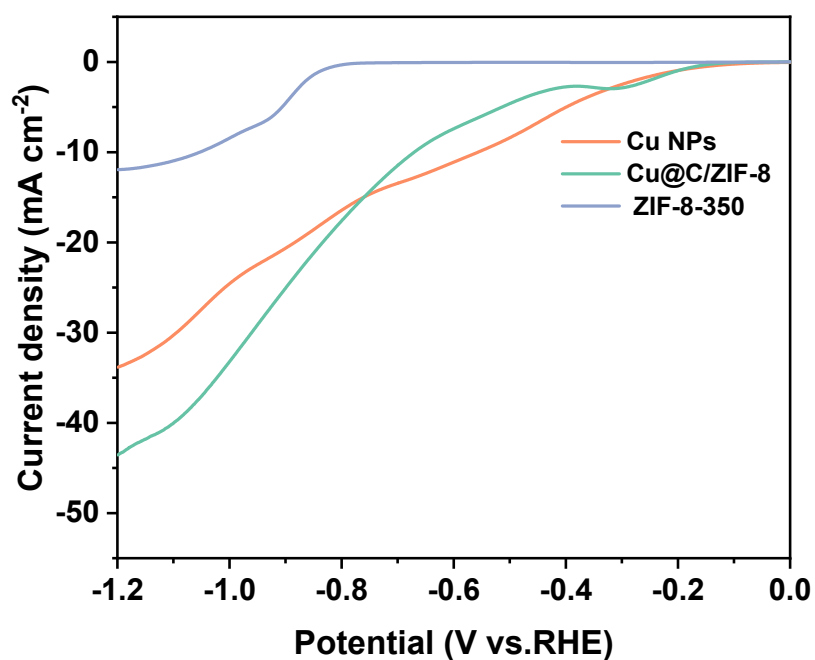

Fig. S3. LSV curves of different catalysts.

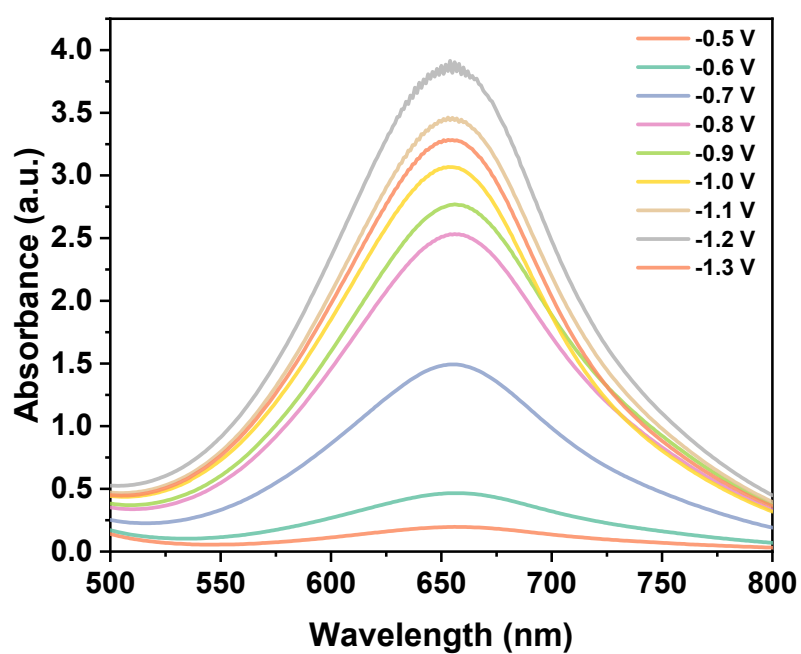

Fig. S4. UV-visible absorption spectra of Cu@C/ZIF-8 at different potentials.

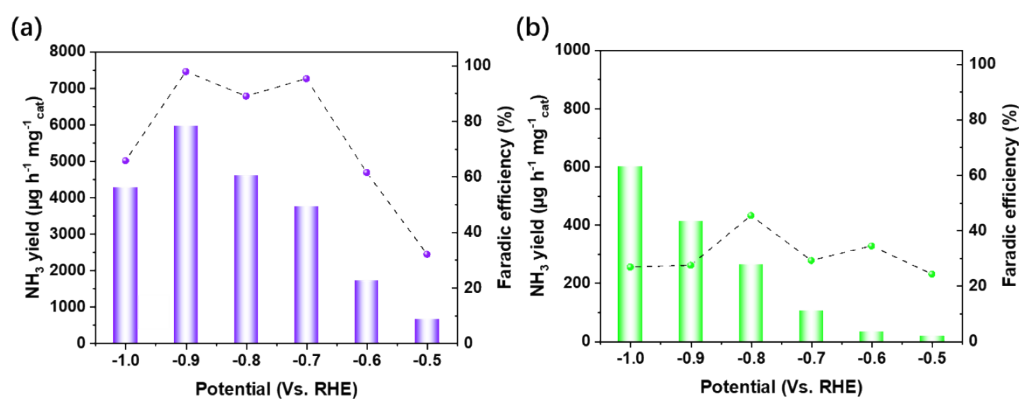

**Fig. S5.** (a) Ammonium yield and Faraday efficiency of Cu NPs and (b) ZIF-8-350 at different potentials.

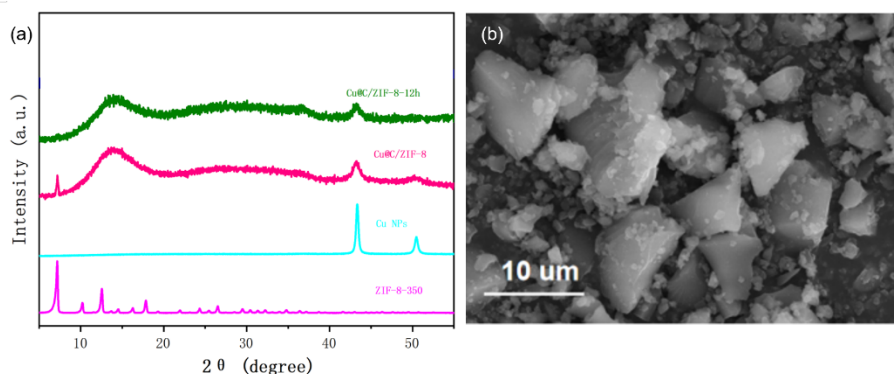

**Fig. S6.** (a) XRD and (b) SEM patterns of Cu@C/ZIF-8 after 12 h electrolysis.

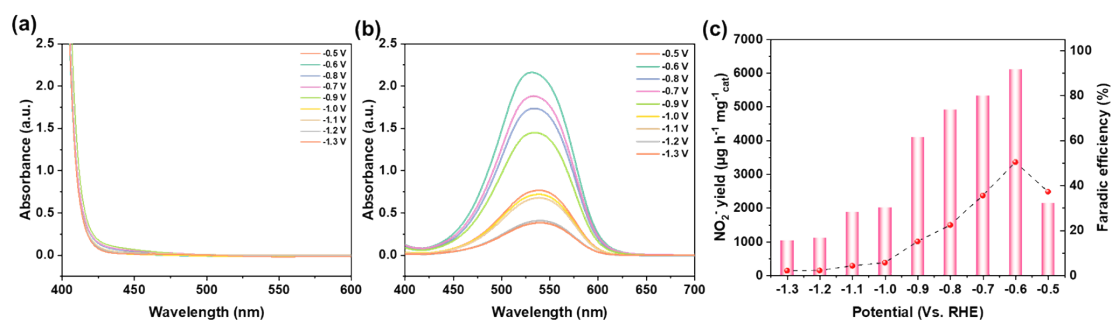

**Fig. S7.** Determination of Cu@C/ZIF-8 byproducts: (a) UV-vis absorption spectra of N<sub>2</sub>H<sub>4</sub> and (b) NO<sub>2</sub><sup>-</sup>; (c) NO<sub>2</sub><sup>-</sup> yield and Faraday efficiency at -0.5V ~ -1.3 V vs. RHE.

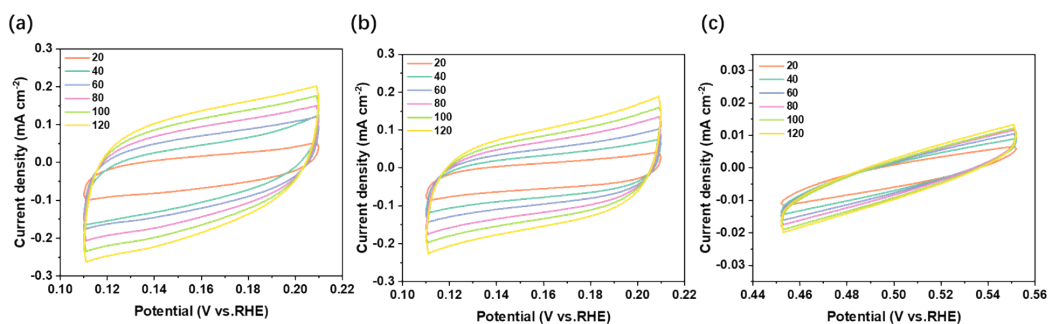

**Fig. S8.** Double layer capacitance for different catalysts: (a) CV diagram of Cu@C/ZIF-8, (b) Cu NPs and (c) ZIF-8-350.

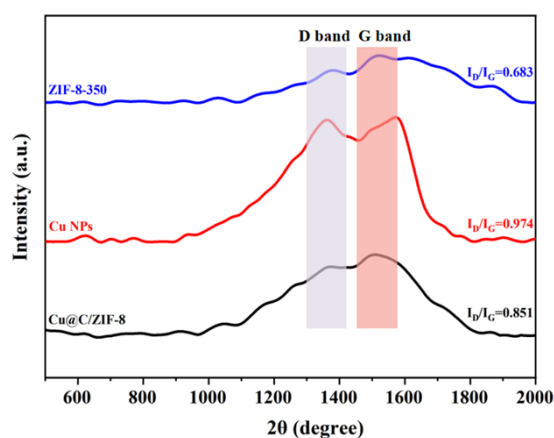

**Fig. S9.** Raman spectra of ZIF-8-350, Cu NPs and Cu@C/ZIF-8.

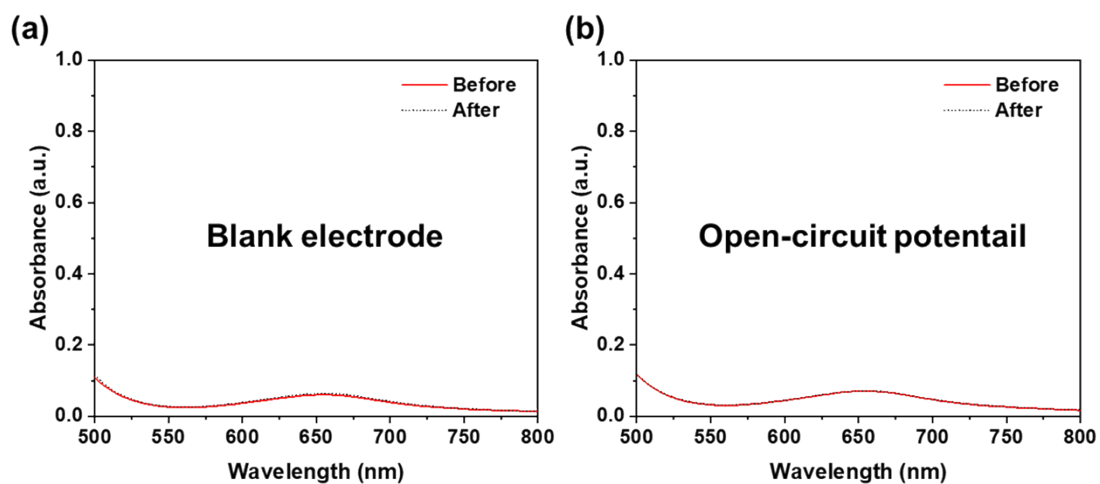

**Fig. S10.** UV-vis absorption spectra of (a) blank electrode and (b) reaction at open-circuit potential before and after reaction for 2 h.
